# Supplementary material for: Thermoresponsive properties of polymer hydrogels induced by copolymerization of hydrophilic and hydrophobic monomers: comprehensive study of monomer sequence and water affinity
Source: Royal Society of Chemistry journal article supplement (doi:10.1039/d1sm00596k), 2021-01-01
Supplement: d1sm00596k1.pdf [file d1sm00596k1.pdf]

*Electronic Supplementary Information*

**Thermoresponsive Property of Polymer Hydrogels Induced by  
Copolymerization of Hydrophilic and Hydrophobic Monomers: Comprehensive  
Study from Monomer Sequence and Water Affinity**

***Shohei Ida\**, *Daiki Nishisako*, *Ayaka Fujiseki*, and *Shokyoku Kanaoka\****

Department of Materials Science, Faculty of Engineering, The University of Shiga Prefecture, 2500

Hassaka, Hikone, Shiga 522-8533, Japan

Correspondence: [ida.s@mat.usp.ac.jp](mailto:ida.s@mat.usp.ac.jp) (S.I.), and [kanaoka.s@mat.usp.ac.jp](mailto:kanaoka.s@mat.usp.ac.jp) (S.K.)

## Determination of Copolymerization Reactivity Ratio

The copolymerization reactivity ratios were determined by the Kelen-Tüdös method. Radical random copolymerization of various combinations of hydrophilic monomer and hydrophobic monomer, and the monomer consumption behavior was monitored using  $^1\text{H}$  NMR spectroscopy. When  $M_1$  and  $M_2$  denote a hydrophilic monomer and a hydrophobic monomer, respectively, the following four cross-propagation reactions proceed in a radical copolymerization of  $M_1$  and  $M_2$ :

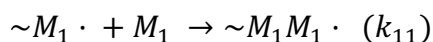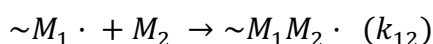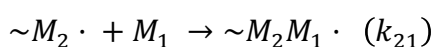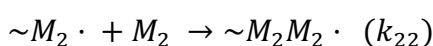

where  $k_{11}$ ,  $k_{12}$ ,  $k_{21}$  and  $k_{22}$  stand for the rate constant for each reaction. The reactivity ratios for  $M_1$  and  $M_2$ , or  $r_1$  and  $r_2$ , are defined as  $r_1 = k_{11}/k_{12}$  and  $r_2 = k_{22}/k_{21}$ .

The parameters  $H$  and  $G$  are calculated as below (Eq. S1 and S2) using monomer feed ratio,  $F$  ( $= [M_1]/[M_2]$ ), and composition ratio in the polymer produced at the early stage of a polymerization reaction,  $f$  ( $= d[M_1]/d[M_2]$ ).

$$H = \frac{F^2}{f} \quad (\text{S1})$$

$$G = \frac{F(f-1)}{f} \quad (\text{S2})$$

The copolymerization reactivity ratios are determined by Eq. S3:

$$\eta = \left( r_1 + \frac{r_2}{\alpha} \right) \xi - \frac{r_2}{\alpha} \quad (\text{S3})$$

where

$$\eta = \frac{G}{\alpha + H} \quad (\text{S4})$$

$$\xi = \frac{H}{\alpha + H} \quad (\text{S5})$$

$$\alpha = (H_{min} \times H_{max})^{\frac{1}{2}} \quad (S6)$$

$\alpha$  is determined by the maximum and minimum  $H$  among the experimental values. The  $\eta$  is plotted against  $\xi$ , and  $r_1$  and  $r_2$  are obtained from the slope and the intercept (Tables S1 ~ S6 and Fig. S1).

**Table S1.** Parameters for Kelen-Tüdös plots of copolymerization of HEAAm and tBAAm.<sup>a</sup>

|        | [HEAAm] : [tBAAm] |        |        |       |       |
|--------|-------------------|--------|--------|-------|-------|
|        | 1 : 9             | 3 : 7  | 5 : 5  | 7 : 3 | 9 : 1 |
| $F$    | 0.110             | 0.429  | 1.00   | 2.34  | 8.97  |
| $f$    | 0.150             | 0.506  | 1.02   | 3.09  | 13.9  |
| $H$    | 0.0806            | 0.363  | 0.983  | 1.76  | 5.80  |
| $G$    | -0.623            | -0.418 | 0.017  | 1.58  | 8.32  |
| $\xi$  | 0.105             | 0.347  | 0.590  | 0.721 | 0.895 |
| $\eta$ | -0.814            | -0.400 | 0.0104 | 0.646 | 1.28  |

<sup>a</sup> Reaction condition: see the caption of Fig. 3.  $\alpha = 0.684$ .

**Table S2.** Parameters for Kelen-Tüdös plots of copolymerization of HEA and tBAAm.<sup>a</sup>

|        | [HEA] : [tBAAm] |        |       |       |       |
|--------|-----------------|--------|-------|-------|-------|
|        | 1 : 9           | 3 : 7  | 5 : 5 | 7 : 3 | 9 : 1 |
| $F$    | 0.114           | 0.435  | 1.03  | 2.36  | 8.85  |
| $f$    | 0.135           | 0.689  | 1.50  | 2.51  | 9.70  |
| $H$    | 0.0961          | 0.274  | 0.704 | 2.23  | 8.08  |
| $G$    | -0.729          | -0.196 | 0.341 | 1.42  | 7.94  |
| $\xi$  | 0.097           | 0.234  | 0.440 | 0.713 | 0.902 |
| $\eta$ | -0.735          | -0.167 | 0.213 | 0.455 | 0.886 |

<sup>a</sup> Reaction condition: see the caption of Fig. 3.  $\alpha = 0.896$ .

**Table S3.** Parameters for Kelen-Tüdös plots of copolymerization of HEAAm and tBA.<sup>a</sup>

|          | [HEAAm] : [tBA] |        |        |       |       |
|----------|-----------------|--------|--------|-------|-------|
|          | 1 : 9           | 3 : 7  | 5 : 5  | 7 : 3 | 9 : 1 |
| <i>F</i> | 0.111           | 0.442  | 1.03   | 2.36  | 9.14  |
| <i>f</i> | 0.062           | 0.370  | 0.713  | 1.85  | 7.16  |
| <i>H</i> | 0.198           | 0.528  | 1.48   | 3.02  | 11.66 |
| <i>G</i> | -1.68           | -0.753 | -0.414 | 1.08  | 7.87  |
| $\xi$    | 0.115           | 0.258  | 0.493  | 0.665 | 0.885 |
| $\eta$   | -0.978          | -0.368 | -0.138 | 0.238 | 0.597 |

<sup>a</sup> Reaction condition: see the caption of Fig. 3.  $\alpha = 1.52$ .

**Table S4.** Parameters for Kelen-Tüdös plots of copolymerization of HEA and tBA.<sup>a</sup>

|          | [HEA] : [tBA] |        |        |       |       |
|----------|---------------|--------|--------|-------|-------|
|          | 1 : 9         | 3 : 7  | 5 : 5  | 7 : 3 | 9 : 1 |
| <i>F</i> | 0.101         | 0.423  | 1.04   | 2.38  | 9.23  |
| <i>f</i> | 0.087         | 0.382  | 0.788  | 1.96  | 12.4  |
| <i>H</i> | 0.116         | 0.469  | 1.37   | 2.89  | 6.85  |
| <i>G</i> | -1.05         | -0.685 | -0.279 | 1.17  | 8.49  |
| $\xi$    | 0.115         | 0.345  | 0.605  | 0.764 | 0.885 |
| $\eta$   | -1.04         | -0.503 | -0.124 | 0.309 | 1.10  |

<sup>a</sup> Reaction condition: see the caption of Fig. 3.  $\alpha = 0.892$ .

**Table S5.** Parameters for Kelen-Tüdös plots of copolymerization of HEAAm and MA.<sup>a</sup>

|          | [HEAAm] : [MA] |        |        |         |       |
|----------|----------------|--------|--------|---------|-------|
|          | 1 : 9          | 3 : 7  | 5 : 5  | 7 : 3   | 9 : 1 |
| <i>F</i> | 0.109          | 0.416  | 0.970  | 2.19    | 7.56  |
| <i>f</i> | 0.0801         | 0.312  | 0.614  | 1.01    | 6.21  |
| <i>H</i> | 0.148          | 0.556  | 1.53   | 4.72    | 9.21  |
| <i>G</i> | -1.25          | -0.919 | -0.611 | 0.032   | 6.34  |
| $\xi$    | 0.113          | 0.322  | 0.567  | 0.802   | 0.887 |
| $\eta$   | -0.951         | -0.533 | -0.226 | 0.00543 | 0.611 |

<sup>a</sup> Reaction condition: see the caption of Fig. 3.  $\alpha = 1.17$ .

**Table S6.** Parameters for Kelen-Tüdös plots of copolymerization of HEA and MA.<sup>a</sup>

|          | [HEA] : [MA] |        |         |       |       |
|----------|--------------|--------|---------|-------|-------|
|          | 1 : 9        | 3 : 7  | 5 : 5   | 7 : 3 | 9 : 1 |
| <i>F</i> | 0.113        | 0.433  | 1.00    | 2.43  | 7.51  |
| <i>f</i> | 0.0891       | 0.413  | 0.874   | 2.28  | 5.06  |
| <i>H</i> | 0.143        | 0.454  | 1.14    | 2.58  | 11.14 |
| <i>G</i> | -1.16        | -0.615 | -0.145  | 1.36  | 6.03  |
| $\xi$    | 0.102        | 0.264  | 0.475   | 0.671 | 0.898 |
| $\eta$   | -0.821       | -0.358 | -0.0601 | 0.355 | 0.486 |

<sup>a</sup> Reaction condition: see the caption of Fig. 3.  $\alpha = 1.26$ .

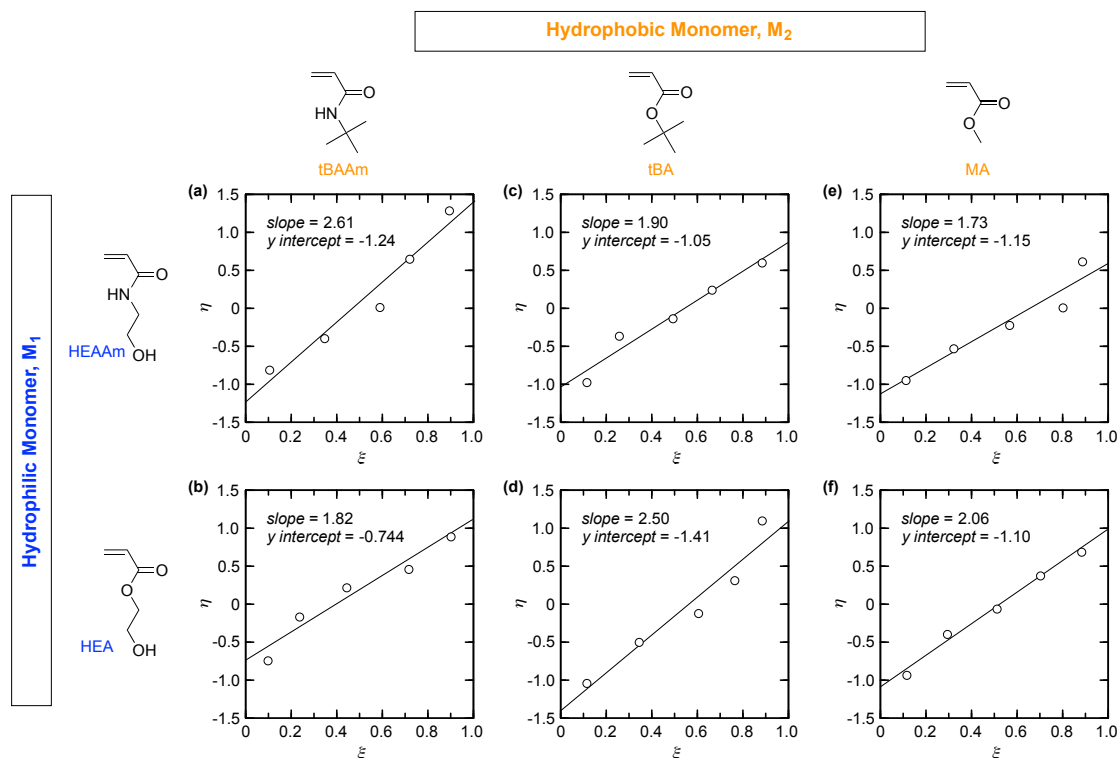

**Fig. S1** Kelen-Tüdös plots for radical copolymerization of hydrophilic and hydrophobic monomers: (a) HEAAm/tBAAm, (b) HEA/tBAAm, (c) HEAAm/tBA, (d) HEA/tBA, (e) HEAAm/MA, and (f) HEA/MA.

**Table S7.** Water/octanol partition coefficient of the monomers.

| Monomer | Value              |
|---------|--------------------|
| HEAAm   | -0.63 <sup>a</sup> |
| HEA     | -0.21 <sup>a</sup> |
| tBAAm   | 1.45 <sup>b</sup>  |
| tBA     | 2.09 <sup>c</sup>  |
| MA      | 0.80 <sup>a</sup>  |

<sup>a</sup> Obtained from safety data sheet (SDS) published by Tokyo Chemical Industry. <sup>b</sup> Obtained from data shown in the website of European Chemicals Agency. <sup>c</sup> Obtained from SDS published by Fujifilm Wako Pure Chemicals.

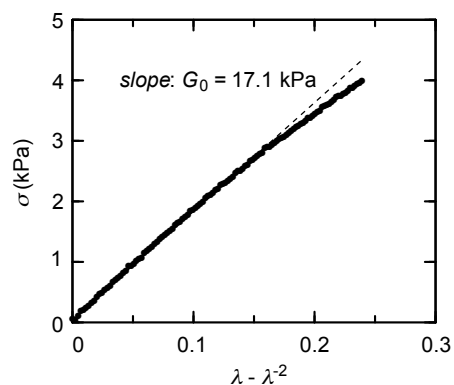

**Fig. S2**  $\sigma$  vs  $\lambda - \lambda^2$  plot for HEAAm/tBAAm copolymerization gel (HEAAm : tBAAm = 4 : 6). The initial slope corresponds to shear modulus,  $G_0 (= \nu_0 kT)$ .

**Table S8.**  $\nu_0$  and  $\phi_0$  of the copolymerization gels.<sup>a</sup>

| Entry | Monomer     |             | Composition | $\nu_0$ (mol/m <sup>3</sup> ) | $\phi_0$ |
|-------|-------------|-------------|-------------|-------------------------------|----------|
|       | Hydrophilic | Hydrophobic |             |                               |          |
| 1     | HEAAm       | tBAAm       | 8 : 2       | 8.07                          | 0.130    |
| 2     |             |             | 5 : 5       | 8.43                          | 0.136    |
| 3     |             |             | 4 : 6       | 6.91                          | 0.156    |
| 4     | HEA         | tBAAm       | 9 : 1       | 7.34                          | 0.130    |
| 5     |             |             | 8 : 2       | 8.77                          | 0.136    |
| 6     | HEA         | tBA         | 9 : 1       | 7.86                          | 0.134    |
| 7     | HEAAm       | -           | 10 : 0      | 12.6                          | 0.126    |
| 8     | HEA         | -           | 10 : 0      | 6.04                          | 0.128    |

<sup>a</sup>  $\nu_0$  was obtained from the results of the uniaxial tensile test, and  $\phi_0$  was obtained from the weight measurement of the methanol solution of the corresponding linear polymers in a predetermined volume, or calculation from the density of the monomer and feed composition.

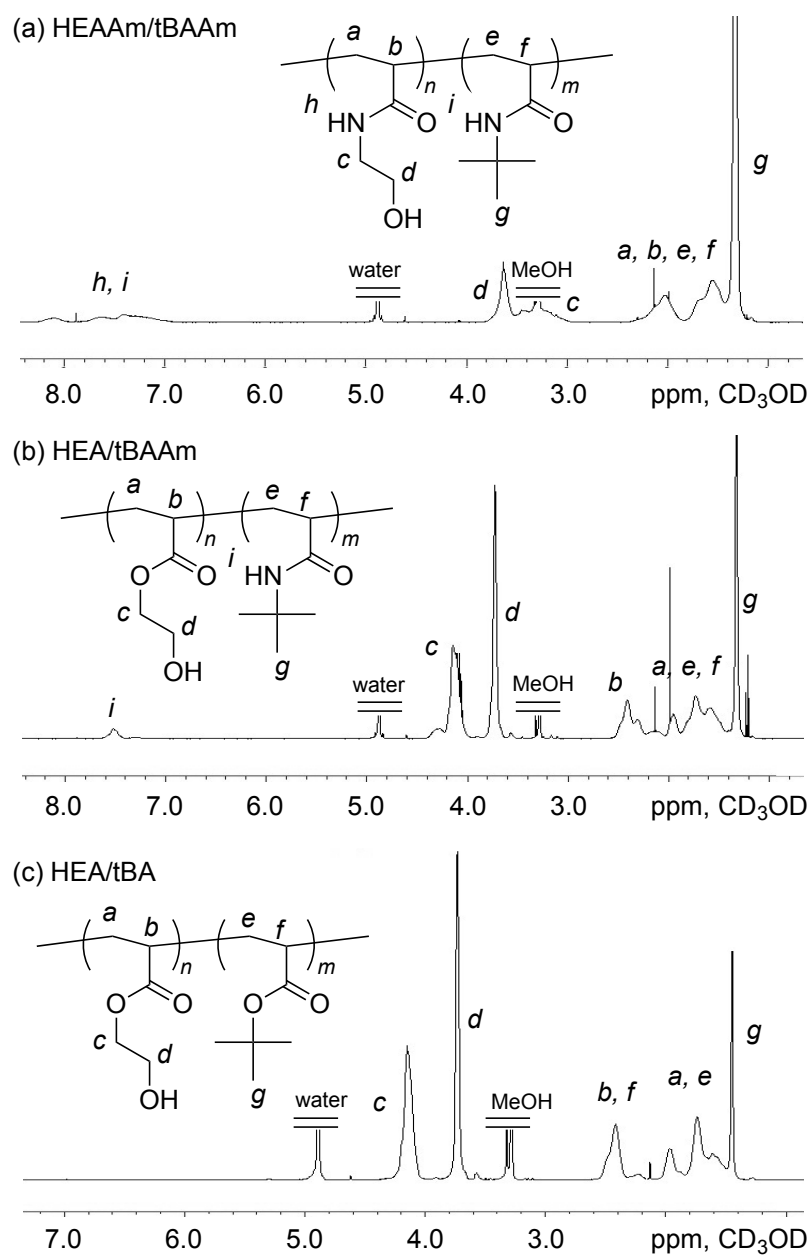

**Fig. S3** <sup>1</sup>H NMR spectra of hydrophilic/hydrophobic copolymers: (a) HEAAm/tBAAm (4 : 6), (b) HEA/tBAAm (8 : 2), and (c) HEAAm/tBA (9 : 1).
